# Supplementary material
Source: publisher site journal article supplement (https://www.dovepress.com/article/290636)
Supplement: Supplementary file 1 [file get_supplementary_file.php]

| Icotinib Group | Interval time (Days) | Cisplatin plus Docetaxel Group | Interval time (Days) |
| --- | --- | --- | --- |
| Case1 | 63 | Case1 | 38 |
| Case2 | 20 | Case2 | 26 |
| Case3 | 48 | Case3 | 39 |
| Case4 | 47 | Case4 | 20 |
| Case5 | 30 | Case5 | 22 |
| Case6 | 27 | Case6 | 30 |
| Case7 | 75 | Case7 | 29 |
| Case8 | 38 | Case8 | 35 |
| Case9 | 29 | Case9 | 21 |
| Case10 | 42 | Case10 | 26 |
| Case11 | 20 | Case11 | 22 |
| Case12 | 22 | Case12 | 36 |
| Case13 | 30 | Case13 | 34 |
| Case14 | 28 | Case14 | 28 |
| Case15 | 27 | Case15 | 29 |
| Case16 | 21 | Case16 | 34 |
| Case17 | 33 | Case17 | 33 |
| Case18 | 40 | Case18 | 36 |
| Case19 | 37 | Case19 | 37 |
| Case20 | 33 | Case20 | 32 |
| Case21 | 52 | Case21 | 35 |
| Case22 | 31 |  |  |

Supplement table 1: Interval between the surgery and the beginning of adjuvant therapy

Supplement table 2: Treatments of patients in the Cisplatin plus Docetaxel Group after progression before the data cut-off point (April 10, 2020).

| Cisplatin plus Docetaxel Group | Treatments | Date of using EGFR-TKIs |
| --- | --- | --- |
| Case 1 | Icotinib + 4 cycles of pemetrexed monotherapy | Oct 16, 2018 |
| Case 2 | Icotinib | Sep 6, 2018 |
| Case 3 | Icotinib | Sep 20, 2016 |
| Case 4 | Brain radiotherapy, Icotinib + 1 cycle of carboplatin plus pemetrexed plus bevacizumab chemotherapy, 1 cycle of bevacizumab monotherapy | Jun 16, 2017 |
| Case 5 | Brain radiotherapy + Icotinib | Jul 12, 2017 |
| Case 6 | Bone radiotherapy + Icotinib | Oct 25, 2017 |
| Case 7 | Icotinib | Feb 1, 2018 |
| Case 8 | Brain radiotherapy + Icotinib | Mar 8, 2016 |
| Case 9 | Icotinib | Feb 26, 2018 |
| Case 10 | Icotinib | Apr 12, 2018 |
| Case 11 | Icotinib | Oct 30, 2018 |
| Case 12 | Icotinib | Sep 29, 2015 |
| Case 13 | Icotinib | Mar 30, 2015 |
| Case 14 | 4 cycles of carboplatin plus pemetrexed chemotherapy, 2 cycles of pemetrexed monotherapy, Icotinib | Apr 24, 2019 |
| Case 15 | Icotinib | Jan1, 2014 |
| Case 16 | Icotinib | Aug 10, 2015 |
| Case 17 | Brain radiotherapy + Icotinib | Feb 9, 2016 |
| Case 18 | Icotinib, Osimertinib (after progression on icotinib and presence of the EGFR T790M mutation) | Dec 4, 2015 |
| Case 19 | Icotinib, 6 cycles of docetaxel plus bevacizumab chemotherapy, 3 cycles of carboplatin plus paclitaxel plus bevacizumab chemotherapy | Jun 21, 2018 |
| Case 20 | Icotinib | Dec 3, 2012 |
| Case 21 | / | / |

Note: Case 21 relapsed with brain metastasis and was admitted to the hospital in a coma. Unfortunately, this patient passed away later and had no chance to use EGFR-TKIs.


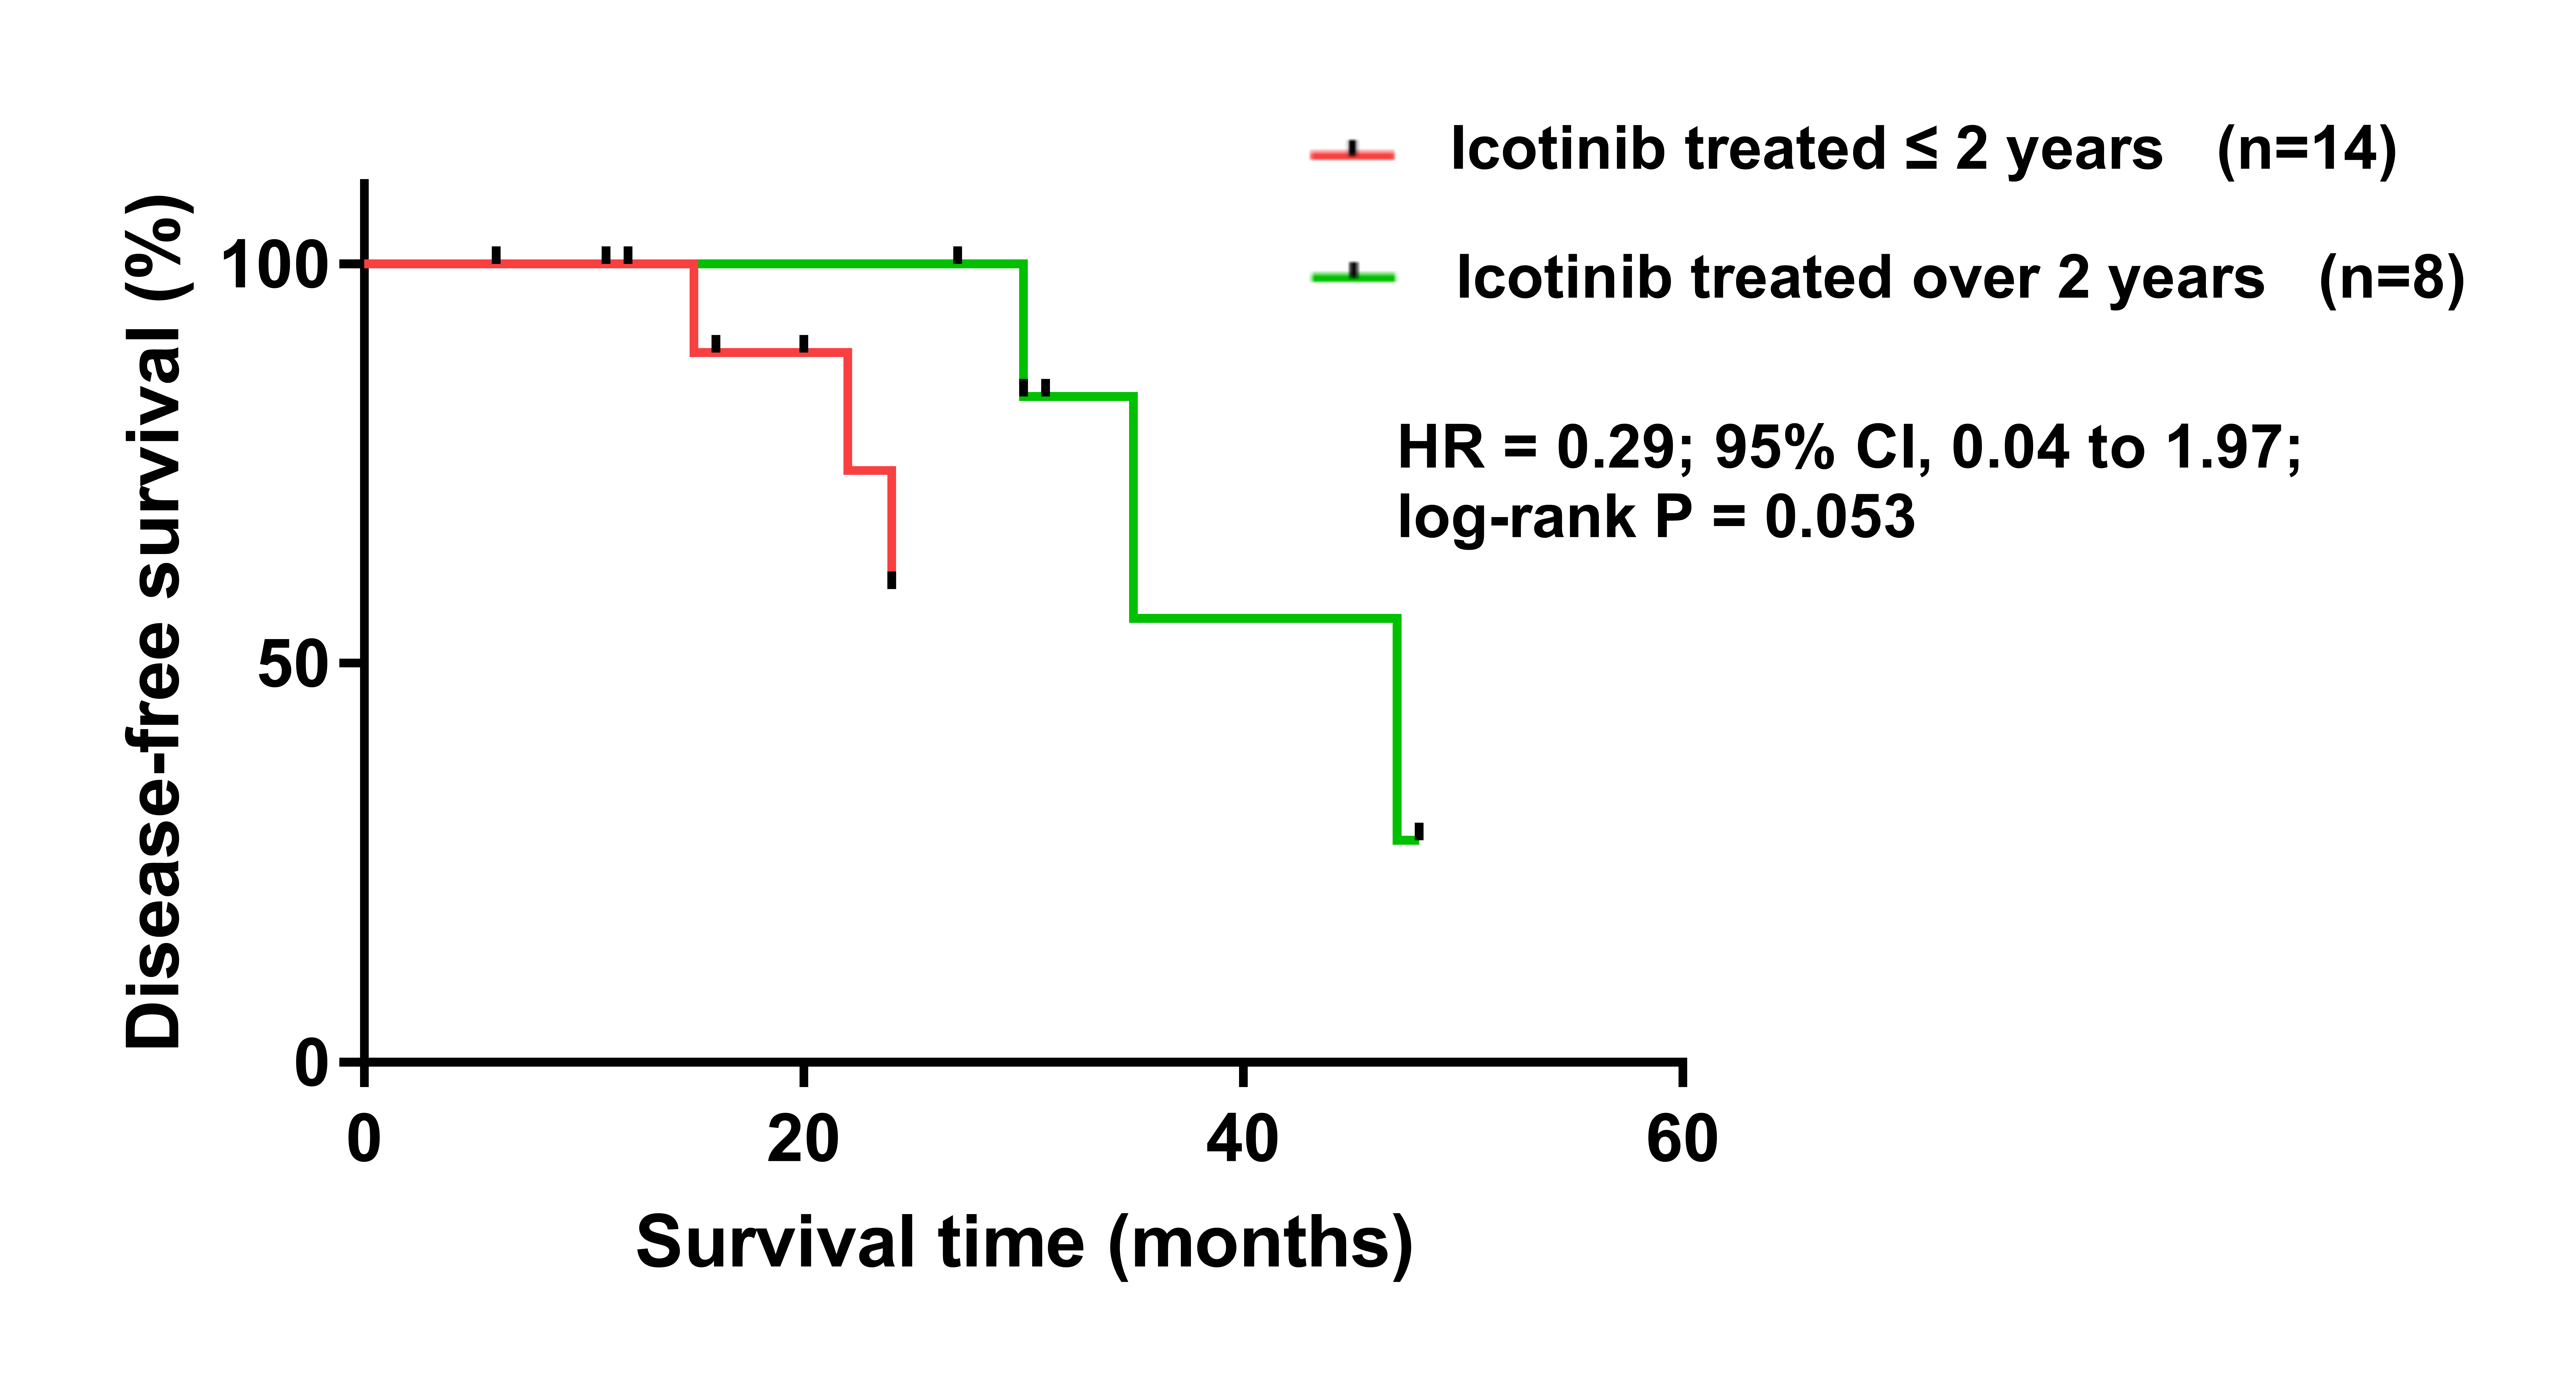


Supplement figure 1: Kaplan-Meier curves for disease-free survival of icotinib group patients treated for ≤ 2-year and ＞2-year.


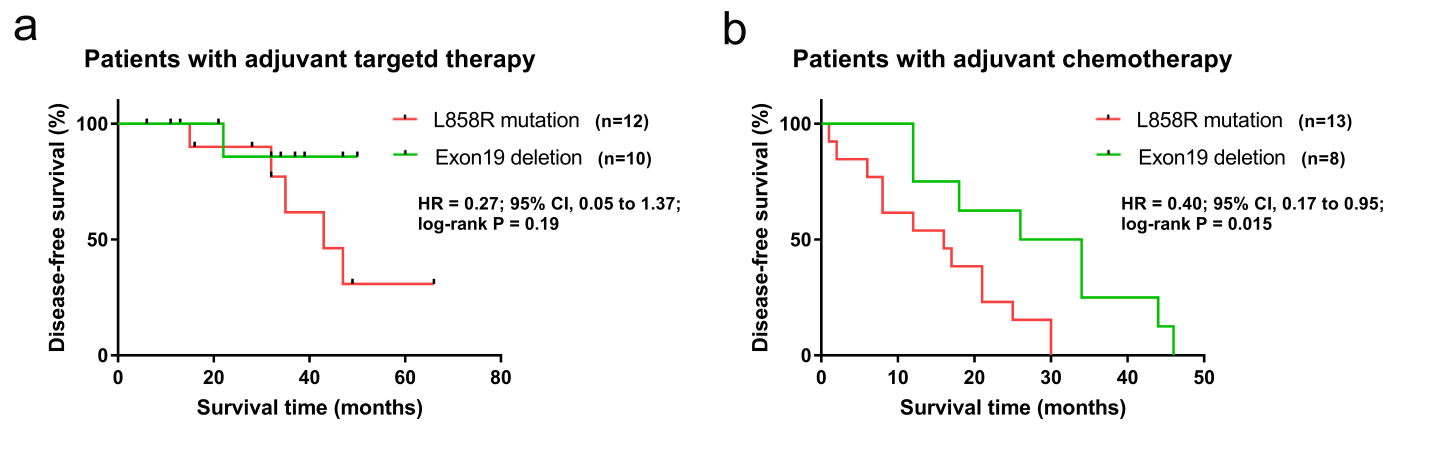


Supplement figure 2: Kaplan-Meier curves for DFS. (a) DFS of patients with exon19 deletion and L858R mutation treated with adjuvant targeted therapy. (b) DFS of patients with exon19 deletion and L858R mutation treated with adjuvant chemotherapy.
